# Supplementary material for: Thermosensitive hyperbranched polyethylenimine partially substituted with N-isopropylacrylamide monomer: thermodynamics and use in developing a thermosensitive graphene composite
Source: Royal Society of Chemistry journal article supplement (doi:10.1039/c4ra02242d), 2014-01-01
Supplement: c4ra02242d1.pdf [file c4ra02242d1.pdf]

Supporting Information for

# Thermosensitive Hyperbranched Polyethylenimine Partially Substituted with N- isopropylacrylamide Monomer: Thermodynamics and for Gluing Graphene Oxide†

Yong Liu, Wenlong Li, Lei Hou and Peiyi Wu\*

State Key Laboratory of Molecular Engineering of Polymers, Department of  
Macromolecular Science and Laboratory of Advanced Materials, Fudan University,  
Shanghai, 200433, P. R. China.

Email: [peiyiwu@fudan.edu.cn](mailto:peiyiwu@fudan.edu.cn)

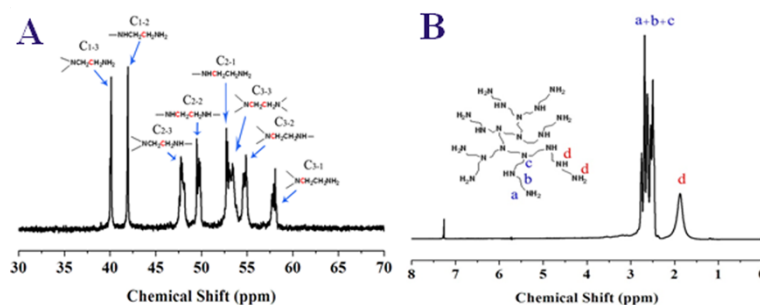

Figure S1. (A, B) <sup>13</sup>CNMR and <sup>1</sup>HNMR spectra of HPEI in CDCl<sub>3</sub>
